# Supplementary material for: The triplet-charge annihilation in copolymer-based organic light emitting diodes: through the “Scattering Channel” or the “Dissociation Channel”?
Source: Royal Society of Chemistry journal article supplement (doi:10.1039/c5cp05016b), 2015-01-01
Supplement: c5cp05016b1.pdf [file c5cp05016b1.pdf]

# Supporting Information for “The Triplet-Charge Annihilation in Copolymer-Based Organic Light Emitting Diodes: Through “Scattering Channel” or “Dissociation Channel”?”

*De Yuan,<sup>a</sup> Lianbin Niu,<sup>b</sup> Qiusong Chen,<sup>a</sup> Weiyao Jia,<sup>a</sup> Ping Chen,<sup>\*a</sup> and Zuhong Xiong<sup>\*a</sup>*

*<sup>a</sup> School of Physical Science and Technology, MOE Key Laboratory on Luminescence and Real-*

*Time Analysis, Southwest University, Chongqing 400715, P. R. China*

*<sup>b</sup> College of Physics and Electronic Engineering, Chongqing Normal University, Chongqing*

*400047, P. R. China*

Author to whom correspondence should be addressed.

Electronic mail: [1a\) chenping206@126.com](mailto:1a)chenping206@126.com) and [zhxiong@swu.edu.cn](mailto:zhxiong@swu.edu.cn)

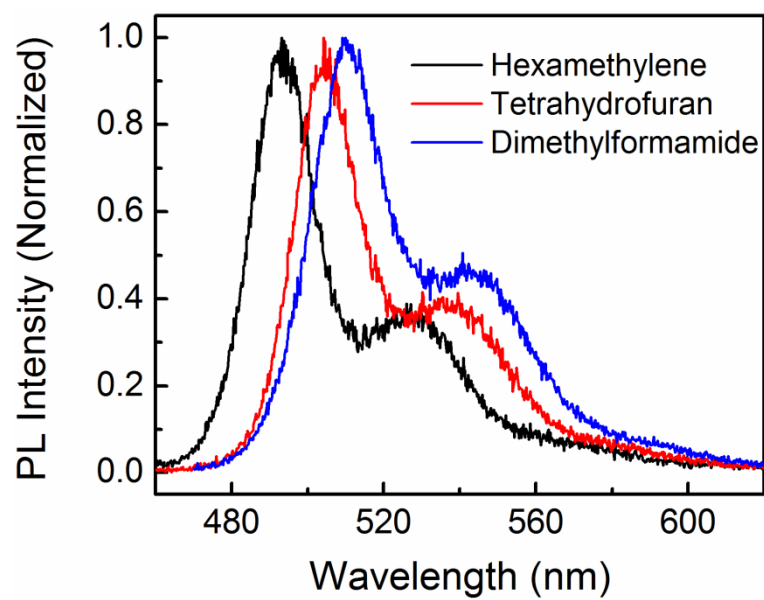

Figure S1. The solvatochromic effect of PFOPV in solution of hexamethylene (black), tetrahydrofuran (red) and dimethylformamide (blue). By increasing the solvent polarity, a large red-shift of PL spectra and enhanced CT emission of PFOPV were observed.

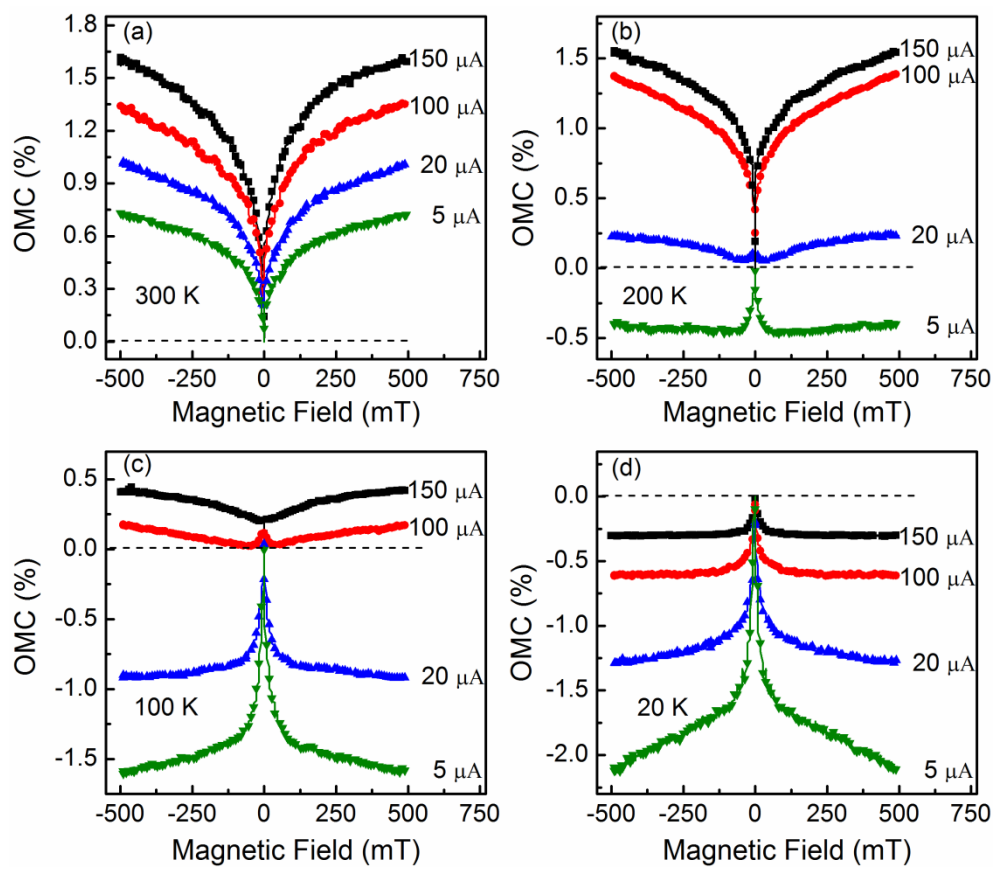

Figure S2. OMC of PFOPV-based OLEDs under different currents (150  $\mu\text{A}$ , 100  $\mu\text{A}$ , 20  $\mu\text{A}$ , and 5  $\mu\text{A}$ ) at temperatures of (a) 300 K, (b) 200 K, (c) 100 K and (d) 20 K.
